# Supplementary material
Source: PubMed Central journal article supplement (PMC129449)
Supplement: pnas_192240599_13.pdf [file pnas_192240599_13.pdf]

| Sample Number | Age | Sex | Pathological diagnosis      | Diff. grade | Nodes | Survival | Obs.(months) |
|---------------|-----|-----|-----------------------------|-------------|-------|----------|--------------|
| 544           | 66  | M   | SCLC                        |             | 0/2   | dead     | 12           |
| 571           | 68  | M   | SCLC, intermediate          |             | 0/2   | dead*    | 63           |
| 594           | 69  | M   | SCC, basaloid type          |             | 1/3   | alive    | 44           |
| 602           | 67  | M   | AC, Papillary               | well        | 1/2   | alive    | 65           |
| 694           | 85  | M   | SCC                         | poorly      | 1/2   | dead     | 21           |
| 707           | 46  | M   | AC                          | moderately  |       | alive    | 61           |
| 726           | 65  | F   | bronchiolo-alveolar AC      | well        |       | alive    | 62           |
| 745           | 70  | M   | LCC, Spindle cell           |             |       | dead     | 5            |
| 747           | 60  | M   | AC, Papillary               | poorly      |       | alive    | 61           |
| 798           | 76  | M   | normal                      | n/a         |       | n/a      | n/a          |
| 833           | 52  | M   | AC, Papillary               | moderately  |       | alive    | 62           |
| 841           | 54  | M   | AC with spindle cell change | poorly      |       | dead     | 10           |
| 866           | 67  | M   | AC, mucus secreting         | well        |       | alive    | 61           |
| 882           | 61  | F   | AC, Papillary               | well        |       | alive    | 59           |
| 874           | 47  | M   | AC, Papillary               | moderately  |       | alive    | 60           |
| 936           | 63  | M   | AC, Papillary               | moderately  |       | dead     | 24           |
| 948           | 59  | F   | AC, Papillary               | moderately  | 1/5   | alive    | 56           |
| 1017          | 59  | F   | AC, Papillary               | poorly      |       | alive    | 60           |
| 1037          |     |     | normal                      | n/a         |       | n/a      | n/a          |
| 1050          |     |     | normal                      | n/a         |       | n/a      | n/a          |
| 1051          | 68  | M   | SCC                         | moderately  | 1/4   | dead     | 38           |
| 1056          |     |     | normal                      | n/a         |       | n/a      | n/a          |
| 1071          | 75  | M   | SCC                         | moderately  |       | dead     | 48           |
| 1074          |     |     | normal                      | n/a         |       | n/a      | n/a          |
| 1078          |     |     | AC, Papillary               | well        |       |          |              |
| 1090          |     |     | normal                      | n/a         |       | n/a      | n/a          |
| 1142          | 59  | M   | AC, Acinar                  | poorly      |       | dead     | 38           |
| 1195          | 76  | F   | SCC                         | moderately  | 0/5   | alive    | 55           |
| 1288          | 57  | M   | SCC                         | moderately  | 2/3   | daed     | 41           |
| 1408          | 74  | M   | SCLC, post chemotherapy     |             |       | dead     | 13           |
| 1438          | 64  | M   | SCC                         | moderately  | 0/4   | alive    | 43           |
| 1485          | 67  | M   | LCC                         |             | 0/6   | alive    | 49           |
| 1498          | 62  | M   | carcinoid, typical          |             | 0/6   | alive    | 55           |
| 1531          | 80  | M   | LCC                         |             | 0/6   | alive    | 54           |
| 1926          | 76  | M   | SCLC                        |             |       | alive    | 49           |
| 1934          | 44  | M   | LCC                         |             |       | dead     | 3            |
| 1997          | 54  | M   | LCC                         |             |       | dead     | 15           |
| 2001          | 70  | M   | SC                          | moderately  |       | alive    | 42           |
| 2013          | 45  | M   | carcinoid, typical          |             |       | dead     | 17           |
| 2212          | 80  | M   | SCLC                        |             |       |          |              |
| 2425          | 53  | M   | SCLC                        |             |       | dead     | 1            |
| 2713          | 50  | M   | AC                          | poorly      |       | dead     | 17           |
| 3105          | 68  | M   | SCLC intermediate           |             |       | alive    | 30           |
| 3124          | 50  | M   | SCC                         | moderately  |       | dead     | 31           |
| 3170          | 68  | F   | SCLC                        |             |       |          |              |
| 3313          | 16  | F   | carcinoid, typical          |             |       | alive    | 24           |
| 4180          | 43  | M   | AC                          | poorly      |       | aead     | 17           |
| 4271          | 71  | M   | SCLC                        |             |       |          |              |
| 4319          | 72  | M   | LCC                         |             |       |          |              |
