# Supplementary material
Source: PubMed Central journal article supplement (PMC129449)
Supplement: pnas_192240599_14.pdf [file pnas_192240599_14.pdf]

| <b>Name</b> | <b>description</b>         | <b>source</b> |
|-------------|----------------------------|---------------|
| ABC-1       | AC                         | JCRB          |
| CALU 1      | SCC                        | ECACC         |
| COLO 668    | SCLC - metastasis to brain | ECACC         |
| COR-L105    | AC                         | ECACC         |
| COR-L51     | SCLC                       | ECACC         |
| COR-L88     | SCLC                       | ECACC         |
| DMS53       | SCLC                       | ATCC          |
| DMS79       | SCLC                       | ATCC          |
| EBC-1       | SCC                        | JCRB          |
| EKVX        | non-small cell lung cancer | NCI           |
| HF19        | fetal lung fibroblast      | RCB           |
| HOP-62      | non-small cell lung cancer | NCI           |
| HOP-92      | non-small cell lung cancer | NCI           |
| IMR-90-SV   | fetal lung fibroblast      | RCB           |
| LC-1/sq     | SCC                        | RCB           |
| LC-2/ad     | AC                         | JCRB          |
| LK-2        | SCC                        | JCRB          |
| Lu-130      | SCLC                       | RCB           |
| Lu-134-A    | SCLC                       | RCB           |
| LUDLU-1     | SCC                        | ECACC         |
| MRC-5       | fetal lung fibroblast      | RCB           |
| MS-1        | SCLC                       | RCB           |
| NCI H460    | non-small cell lung cancer | NCI           |
| NCI H522    | non-small cell lung cancer | NCI           |
| NCI-H226    | non-small cell lung cancer | ATCC          |
| NCI-H23     | AC                         | NCI           |
| NCI-H322    | bronchioloalveolar AC      | ATCC          |
| PC-14       | AC                         | RCB           |
| PC-3        | AC                         | JCRB          |
| RERF-LC-AI  | SCC                        | RCB           |
| RERF-LC-MA  | SCLC                       | JCRB          |
| RERF-LC-MS  | AC                         | JCRB          |
| RERF-LC-OK  | AC                         | JCRB          |
| SBC-2       | SCLC                       | JCRB          |
| SBC-3       | SCLC                       | JCRB          |
| SBC-5       | SCLC                       | JCRB          |
| SK LU 1     | AC                         | ECACC         |
| SK MES 1    | SCC                        | ATCC          |
| SNB-19      | SCLC                       | NCI           |
| SQ-5        | SCC                        | RCB           |
| VMRC-LCD    | AC                         | JCRB          |
